# Supplementary material for: Cannabidiol and Cannabidiol Metabolites: Pharmacokinetics, Interaction with Food, and Influence on Liver Function
Source: MDPI journal article supplement (doi:10.3390/nu14102152), 2022-05-21
Supplement: s1 [file s1]

**Table S2. Influence of Eating On Cannabidiol Pharmacokinetic Parameters**

| <b>Parameter</b>                            |          | <b>725<br/>No Food</b> | <b>725 +<br/>Food</b> |
|---------------------------------------------|----------|------------------------|-----------------------|
| <b>T<sub>max</sub> *</b><br>(min)           | Mean     | 38.2                   | 113.6                 |
|                                             | SD       | 24.9                   | 70.5                  |
|                                             | Median   | 30.0                   | 90.0                  |
|                                             | Range    | 20 – 120               | 45 – 240              |
|                                             | <i>n</i> | 14                     | 14                    |
| <b>C<sub>max</sub> *</b><br>(ng/mL)         | Mean     | 1.8                    | 2.9                   |
|                                             | SD       | 1.5                    | 1.3                   |
|                                             | Median   | 1.2                    | 2.9                   |
|                                             | <i>n</i> | 14                     | 14                    |
| <b>AUC<sub>0-4</sub> *</b><br>(min x ng/mL) | Mean     | 177.3                  | 397.1                 |
|                                             | SD       | 104.8                  | 167.2                 |
|                                             | Median   | 146.4                  | 412.5                 |
|                                             | <i>n</i> | 14                     | 14                    |
| <b>AUC<sub>0-inf</sub></b><br>(min x ng/mL) | Mean     | 301.6                  | -                     |
|                                             | SD       | 221.9                  | -                     |
|                                             | Median   | 301.6                  | -                     |
|                                             | <i>n</i> | 2                      | -                     |
| <b>t<sub>1/2</sub></b><br>(min)             | Mean     | 133.1                  | 248.6                 |
|                                             | SD       | 26.7                   | 304.6                 |
|                                             | Median   | 128.7                  | 126.6                 |
|                                             | <i>n</i> | 13                     | 7                     |
| <b>K<sub>e</sub></b><br>(1/hr)              | Mean     | 0.005                  | 0.005                 |
|                                             | SD       | 0.001                  | 0.002                 |
|                                             | Median   | 0.010                  | 0.010                 |
|                                             | <i>n</i> | 13                     | 7                     |
| <b>V<sub>d</sub></b><br>(mL)                | Mean     | 22687960               | -                     |
|                                             | SD       | 16435999               | -                     |
|                                             | Median   | 22687960               | -                     |
|                                             | <i>n</i> | 2                      | -                     |

SD: Standard Deviation. Limit of quantitation: 0.1 ng/mL. Food was a commercially available mixed macronutrient liquid meal (22% fat, 62% carbohydrate, 16% protein); caloric equivalent to 40% of resting metabolic rate. Values below limit of quantitation were classed as “missing”.

*n*: number of observations used to calculate parameter. T<sub>max</sub>: the time to maximum concentration. C<sub>max</sub>: the maximum concentration. AUC<sub>0-4</sub>: the area under the curve representing total cannabidiol exposure between 0 and 4 hours. AUC<sub>0-inf</sub>: an estimate of the total exposure to cannabidiol over time. t<sub>1/2</sub>: the amount of time it takes to decrease the circulating concentration to half of its initial value. K<sub>e</sub>: the rate at which the cannabidiol is removed from the body. V<sub>d</sub>: the

volume of distribution, an estimate of the degree to which cannabidiol is distributed in the body tissue vs. the plasma. Parameters marked with \* are different ( $P < 0.05$ ).
