# Supplementary material for: Cannabidiol and Cannabidiol Metabolites: Pharmacokinetics, Interaction with Food, and Influence on Liver Function
Source: MDPI journal article supplement (doi:10.3390/nu14102152), 2022-05-21
Supplement: s1 [file s1]

**Table S4. Influence of Eating On 7-OH-Cannabidiol Pharmacokinetic Parameters**

| <b>Parameter</b>                  |          | <b>725<br/>No Food</b> | <b>725 +<br/>Food</b> |
|-----------------------------------|----------|------------------------|-----------------------|
| $T_{\max}$ *<br>(min)             | Mean     | 55.7                   | 162.9                 |
|                                   | SD       | 20.7                   | 64.1                  |
|                                   | Median   | 52.5                   | 180                   |
|                                   | Range    | 30 – 120               | 60 – 240              |
|                                   | <i>n</i> | 14                     | 14                    |
| $C_{\max}$<br>(ng/mL)             | Mean     | 2.73                   | 1.93                  |
|                                   | SD       | 1.64                   | 0.83                  |
|                                   | Median   | 2.27                   | 1.8                   |
|                                   | <i>n</i> | 14                     | 14                    |
| $AUC_{0-4}$<br>(min x ng/mL)      | Mean     | 343.9                  | 313.3                 |
|                                   | SD       | 174.3                  | 147.9                 |
|                                   | Median   | 292.0                  | 296.9                 |
|                                   | <i>n</i> | 14                     | 14                    |
| $AUC_{0-\infty}$<br>(min x ng/mL) | Mean     | 531.1                  | -                     |
|                                   | SD       | 207.1                  | -                     |
|                                   | Median   | 455.1                  | -                     |
|                                   | <i>n</i> | 3                      | -                     |
| $t_{1/2}$<br>(min)                | Mean     | 109.6                  | 438.3                 |
|                                   | SD       | 25.0                   | 284.9                 |
|                                   | Median   | 104.4                  | 438.3                 |
|                                   | <i>n</i> | 13                     | 2                     |
| $K_e$<br>(1/hr)                   | Mean     | 0.007                  | 0.002                 |
|                                   | SD       | 0.001                  | 0.001                 |
|                                   | Median   | 0.010                  | 0.000                 |
|                                   | <i>n</i> | 13                     | 2                     |
| $V_d$<br>(mL)                     | Mean     | 8096154                | -                     |
|                                   | SD       | 3862326                | -                     |
|                                   | Median   | 7746967                | -                     |
|                                   | <i>n</i> | 3                      | -                     |

SD: Standard Deviation. Limit of quantitation: 0.1 ng/mL. Food was a commercially available mixed macronutrient liquid meal (22% fat, 62% carbohydrate, 16% protein); caloric equivalent to 40% of resting metabolic rate. Values below limit of quantitation were classed as “missing”.

*n*: number of observations used to calculate parameter.  $T_{\max}$ : the time to maximum concentration.  $C_{\max}$ : the maximum concentration.  $AUC_{0-4}$ : the area under the curve representing total 7-OH-cannabidiol exposure between 0 and 4 hours.  $AUC_{0-\infty}$ : an estimate of the total exposure to 7-OH-cannabidiol over time.  $t_{1/2}$ : the amount of time it takes to decrease the circulating concentration to half of its initial value.  $K_e$ : the rate at which the 7-OH-cannabidiol is removed from the body.  $V_d$ : the volume of distribution, an estimate of the degree to which 7-OH-

cannabidiol is distributed in the body tissue vs. the plasma. Parameters marked with \* are different ( $P < 0.05$ ).
