# Supplementary material for: Cannabidiol and Cannabidiol Metabolites: Pharmacokinetics, Interaction with Food, and Influence on Liver Function
Source: MDPI journal article supplement (doi:10.3390/nu14102152), 2022-05-21
Supplement: s1 [file s1]

**Table S5. Influence of Eating On COOH-Cannabidiol Pharmacokinetic Parameters**

| <b>Parameter</b>                            |          | <b>725<br/>No Food</b> | <b>725 +<br/>Food</b> |
|---------------------------------------------|----------|------------------------|-----------------------|
| <b>T<sub>max</sub> *</b><br>(min)           | Mean     | 111.4                  | 201.4                 |
|                                             | SD       | 32.1                   | 55.7                  |
|                                             | Median   | 120.0                  | 240.0                 |
|                                             | Range    | 60 – 180               | 60 – 240              |
|                                             | <i>n</i> | 14                     | 14                    |
| <b>C<sub>max</sub> *</b><br>(ng/mL)         | Mean     | 53.8                   | 35.0                  |
|                                             | SD       | 22.9                   | 19.4                  |
|                                             | Median   | 51.6                   | 32.4                  |
|                                             | <i>n</i> | 14                     | 14                    |
| <b>AUC<sub>0-4</sub> *</b><br>(min x ng/mL) | Mean     | 9457.3                 | 5116.7                |
|                                             | SD       | 4263.4                 | 2429.0                |
|                                             | Median   | 7923.3                 | 5641.1                |
|                                             | <i>n</i> | 14                     | 14                    |
| <b>AUC<sub>0-inf</sub></b><br>(min x ng/mL) | Mean     | -                      | -                     |
|                                             | SD       | -                      | -                     |
|                                             | Median   | -                      | -                     |
|                                             | <i>n</i> | -                      | -                     |
| <b>t<sub>1/2</sub></b><br>(min)             | Mean     | 282.5                  | 830.2                 |
|                                             | SD       | 26.6                   | -                     |
|                                             | Median   | 267.8                  | 830.2                 |
|                                             | <i>n</i> | 3                      | 1                     |
| <b>K<sub>e</sub></b><br>(1/hr)              | Mean     | 0.002                  | 0.001                 |
|                                             | SD       | 0.000                  | -                     |
|                                             | Median   | 0.000                  | 0.000                 |
|                                             | <i>n</i> | 3                      | 1                     |
| <b>V<sub>d</sub></b><br>(mL)                | Mean     | -                      | -                     |
|                                             | SD       | -                      | -                     |
|                                             | Median   | -                      | -                     |
|                                             | <i>n</i> | -                      | -                     |

SD: Standard Deviation. Limit of quantitation: 0.1 ng/mL. Food was a commercially available mixed macronutrient liquid meal (22% fat, 62% carbohydrate, 16% protein); caloric equivalent to 40% of resting metabolic rate. Values below limit of quantitation were classed as “missing”. *n*: number of observations used to calculate parameter. T<sub>max</sub>: the time to maximum concentration. C<sub>max</sub>: the maximum concentration. AUC<sub>0-4</sub>: the area under the curve representing total COOH-cannabidiol exposure between 0 and 4 hours. AUC<sub>0-inf</sub>: an estimate of the total exposure to COOH-cannabidiol over time. t<sub>1/2</sub>: the amount of time it takes to decrease the circulating COOH-concentration to half of its initial value. K<sub>e</sub>: the rate at which the COOH-cannabidiol is removed from the body. V<sub>d</sub>: the volume of distribution, an estimate of the degree

to which COOH-cannabidiol is distributed in the body tissue vs. the plasma. Parameters marked with \* are different ( $P < 0.05$ ).
