# Supplementary material for: Cannabidiol and Cannabidiol Metabolites: Pharmacokinetics, Interaction with Food, and Influence on Liver Function
Source: MDPI journal article supplement (doi:10.3390/nu14102152), 2022-05-21
Supplement: s1 [file s1]

Table S1. LC-MS/MS ion transitions monitored for dansyl-derivatives of CBD and metabolites in human plasma.

| <b>Analyte Name</b>     | <b>Precursor Ion</b> | <b>Product Ion</b> | <b>Frag (V)</b> | <b>CE (V)</b> | <b>Cell Acc (V)</b> | <b>Polarity</b> |
|-------------------------|----------------------|--------------------|-----------------|---------------|---------------------|-----------------|
| Dansyl-7-carboxy-CBD    | 811.3                | 796.2              | 130             | 24            | 2                   | Positive        |
| Dansyl-7-carboxy-CBD    | 811.3                | 170.1              | 130             | 45            | 2                   | Positive        |
| Dansyl-7-carboxy-CBD-D3 | 814.3                | 793.2              | 130             | 24            | 2                   | Positive        |
| Dansyl-7-carboxy-CBD-D3 | 814.3                | 170.1              | 130             | 45            | 2                   | Positive        |
| Dansyl-7-hydroxy-CBD    | 797.3                | 779.3              | 80              | 8             | 2                   | Positive        |
| Dansyl-7-hydroxy-CBD    | 797.3                | 17.01              | 80              | 45            | 2                   | Positive        |
| Dansyl-7-hydroxy-CBD-D3 | 800.4                | 782.3              | 80              | 8             | 2                   | Positive        |
| Dansyl-7-hydroxy-CBD-D3 | 800.4                | 170.1              | 80              | 45            | 2                   | Positive        |
| Dansyl-6-hydroxy-CBD    | 779.3                | 545.2              | 165             | 24            | 2                   | Positive        |
| Dansyl-6-hydroxy-CBD    | 779.3                | 170.1              | 165             | 45            | 2                   | Positive        |
| Dansyl-CBD              | 781.3                | 156                | 205             | 28            | 2                   | Positive        |
| Dansyl-CBD              | 781.3                | 170.1              | 205             | 45            | 2                   | Positive        |
| Dansyl-CBD-D3           | 784.3                | 535.2              | 205             | 28            | 2                   | Positive        |
| Dansyl-CBD-D3           | 784.3                | 170.1              | 205             | 45            | 2                   | Positive        |
